# Supplementary material
Source: publisher site journal article supplement (https://www.dovepress.com/article/557274)
Supplement: Supplementary file 1 [file 557274%20Supplementary%20Material.docx]

Supplementary Table 1. Complete baseline characteristics of the study population

| **Characteristic** | **Group** | | | **P value** |
| --- | --- | --- | --- | --- |
| **PD-1  N = 46** | **PD-1+VEGF  N = 55** | **Surg-only  N = 69** |
| **Age, years, n (%)** |  |  |  | 0.601 |
| ˃65 | 10 (21.7%) | 8 (14.5%) | 11 (15.9%) |  |
| ≤65 | 36 (78.3%) | 47 (85.5%) | 58 (84.1%) |  |
| **Sex, n (%)** |  |  |  | 0.689 |
| Female | 5 (10.9%) | 9 (16.4%) | 11 (15.9%) |  |
| Male | 41 (89.1%) | 46 (83.6%) | 58 (84.1%) |  |
| **Hepatitis B, n (%)** |  |  |  | 0.250 |
| No | 8 (17.4%) | 4 (7.3%) | 11 (15.9%) |  |
| Yes | 38 (82.6%) | 51 (92.7%) | 58 (84.1%) |  |
| **Total bilirubin, μmol/L, n (%)** |  |  |  | 0.240 |
| ˃17 | 7 (15.2%) | 14 (25.5%) | 10 (14.5%) |  |
| ≤17 | 39 (84.8%) | 41 (74.5%) | 59 (85.5%) |  |
| **Albumin, g/L, n (%)** |  |  |  | >0.999 |
| ˂35 | 2 (4.3%) | 2 (3.6%) | 2 (2.9%) |  |
| ≥35 | 44 (95.7%) | 53 (96.4%) | 67 (97.1%) |  |
| **ALT, U/L, n (%)** |  |  |  | 0.645 |
| ˃40 | 16 (34.8%) | 15 (27.3%) | 19 (27.5%) |  |
| ≤40 | 30 (65.2%) | 40 (72.7%) | 50 (72.5%) |  |
| **AST, U/L, n (%)** |  |  |  | 0.211 |
| ˃40 | 10 (21.7%) | 16 (29.1%) | 11 (15.9%) |  |
| ≤40 | 36 (78.3%) | 39 (70.9%) | 58 (84.1%) |  |
| **AFP, ng/mL, n (%)** |  |  |  | 0.283 |
| ˃400 | 13 (28.3%) | 18 (32.7%) | 29 (42.0%) |  |
| ≤400 | 33 (71.7%) | 37 (67.3%) | 40 (58.0%) |  |
| **DCP, mAU/ml, n (%)** |  |  |  | 0.257 |
| ˃400 | 22 (47.8%) | 35 (63.6%) | 41 (59.4%) |  |
| ≤400 | 24 (52.2%) | 20 (36.4%) | 28 (40.6%) |  |
| **Cirrhosis, n (%)** |  |  |  | 0.549 |
| With | 22 (47.8%) | 32 (58.2%) | 35 (50.7%) |  |
| Without | 24 (52.2%) | 23 (41.8%) | 34 (49.3%) |  |
| **Tumor size, cm, n (%)** |  |  |  | 0.631 |
| ˃5 | 29 (63.0%) | 34 (61.8%) | 38 (55.1%) |  |
| ≤5 | 17 (37.0%) | 21 (38.2%) | 31 (44.9%) |  |
| **Tumor number, n (%)** |  |  |  | 0.806 |
| Multiple | 4 (8.7%) | 7 (12.7%) | 8 (11.6%) |  |
| Single | 42 (91.3%) | 48 (87.3%) | 61 (88.4%) |  |
| **Tumor differentiation, n (%)** |  |  |  | 0.258 |
| Not poor | 22 (47.8%) | 32 (58.2%) | 30 (43.5%) |  |
| Poor | 24 (52.2%) | 23 (41.8%) | 39 (56.5%) |  |
| **MVI grade, n (%)** |  |  |  | 0.769 |
| High risk | 21 (45.7%) | 29 (52.7%) | 35 (50.7%) |  |
| Low risk | 25 (54.3%) | 26 (47.3%) | 34 (49.3%) |  |

Abbreviations: PD-1, programmed cell death protein 1; VEGF, vascular endothelial growth factor; ALT, alanine aminotransferase; AST, aspartate aminotransferase; AFP, alpha-fetoprotein; DCP, des-gamma-carboxy prothrombin; MVI, microvascular invasion.

Supplementary Table 2. Details of the surgical procedure

| **Characteristic** | **Group** | | | **P value** |
| --- | --- | --- | --- | --- |
| **PD-1  N = 46** | **PD-1+VEGF  N = 55** | **Surg-only  N = 69** |
| **Surgical procedures, n (%)** |  |  |  | 0.234 |
| Laparotomy | 35 (76.1%) | 38 (69.1%) | 48 (69.6%) |  |
| Laparoscopic | 9 (19.6%) | 14 (25.5%) | 21 (30.4%) |  |
| Laparoscopic conversion to laparotomy | 2 (4.3%) | 3 (5.5%) | 0 (0.0%) |  |
| **Surgical margins, n (%)** |  |  |  | 0.255 |
| Narrow | 7 (15.2%) | 15 (27.3%) | 19 (27.5%) |  |
| Wide | 39 (84.8%) | 40 (72.7%) | 50 (72.5%) |  |
| **Resection, n (%)** |  |  |  | 0.675 |
| Anatomic | 7 (15.2%) | 12 (21.8%) | 12 (17.4%) |  |
| Non-anatomic | 39 (84.8%) | 43 (78.2%) | 57 (82.6%) |  |

Abbreviations: PD-1, programmed cell death protein 1; VEGF, vascular endothelial growth factor.

Supplementary Table 3. Event of recurrence-free survival

| **Characteristic** | **Group** | | |
| --- | --- | --- | --- |
| **PD-1  N = 19** | **PD-1+VEGF  N = 23** | **Surg-only  N = 42** |
| Local recurrence | 17 (89.5%) | 17 (73.9%) | 31 (73.8%) |
| Distant recurrence | 0 (0.0%) | 4 (17.4%) | 7 (16.7%) |
| Both local and distant recurrence | 0 (0.0%) | 2 (8.7%) | 4 (9.5%) |
| Death | 2 (10.5%) | 0 (0.0%) | 0 (0.0%) |

Abbreviations: PD-1, programmed cell death protein 1; VEGF, vascular endothelial growth factor.
